# Supplementary material for: Radiomics analysis of lumbar spine X-ray images for diagnosing facet joint osteoarthritis: a two-center study
Source: Research Square preprint supplement (doi:10.21203/rs.3.rs-7515717/v1), 2025-09-22

**Radiomics analysis of lumbar spine X-ray images for diagnosing**

**facet joint osteoarthritis: a two-center study**

**Supplementary Material**

**Supplementary Figures**

**Figure S1:** Features and corresponding weights of the radiomics model constructed using the Logistic regression (A), LinearSVC (B), and SVM (C) algorithm.

**
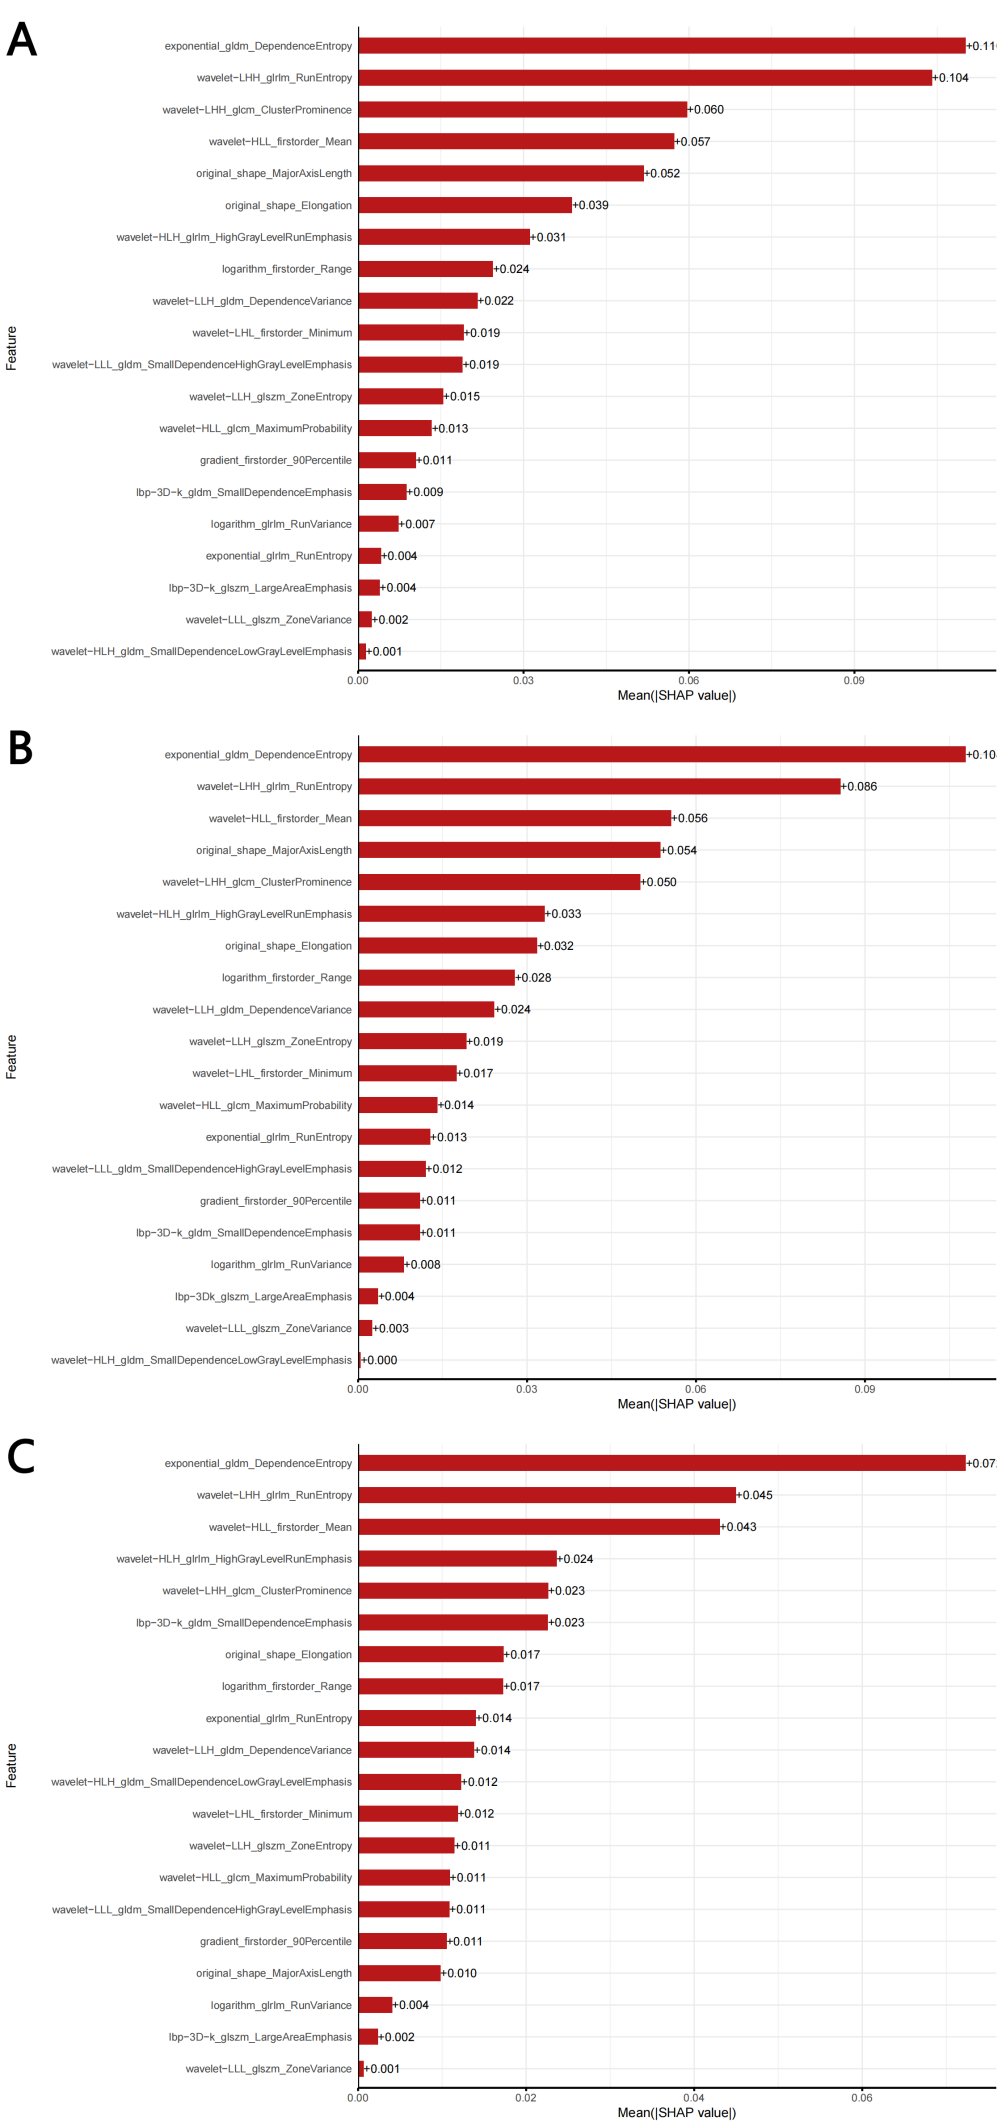
**

**Figure S2:** Calibration curve of Logistic regression model, SVM model, and LinearSVC model in training (A), validation (B), and external test (C) datasets.


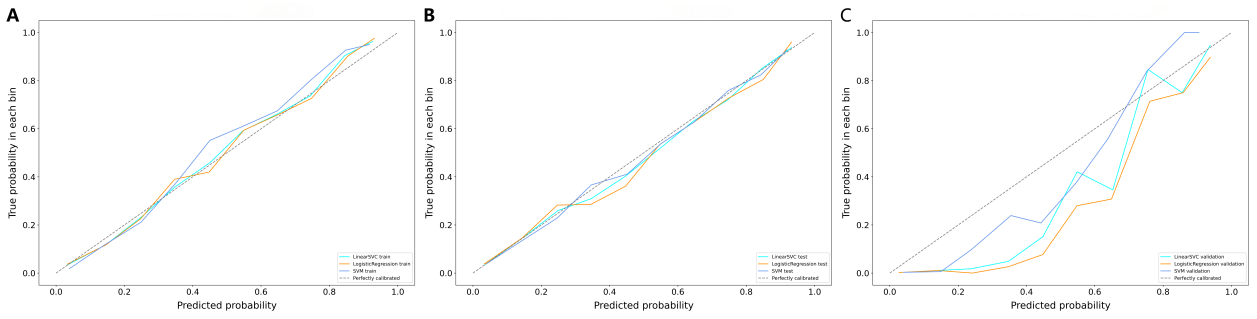

Supplement: Supplementary file 1 [file 3655c8cc74425c3a6ada826c.docx]
